# Supplementary material for: Effects of walking speed on gait biomechanics in healthy participants: a systematic review and meta-analysis
Source: PubMed Central journal article supplement (PMC6595586; doi:10.1186/s13643-019-1063-z), 2019-06-27
Supplement: 13643_2019_1063_MOESM2_ESM.pdf [file 13643_2019_1063_MOESM2_ESM.pdf]

**Table 1. Search strategy**

|   |          |                                                                                                                                                                                   |
|---|----------|-----------------------------------------------------------------------------------------------------------------------------------------------------------------------------------|
| 1 | Keywords | gait [or] walk*                                                                                                                                                                   |
| 2 | Keywords | speed [or] velocit*                                                                                                                                                               |
| 3 | Keywords | kinematic* [or] kinetic* [or] biomech* [or] spatiotemporal [or] spatio-temporal [or] basic parameter\$ [or] angle* [or] torque* [or] moment* [or] grf [or] ground reaction force* |
| 4 | Combine  | 1 [and] 2                                                                                                                                                                         |
| 5 | Combine  | 4 [and] 5                                                                                                                                                                         |
