# Supplementary material for: Effects of walking speed on gait biomechanics in healthy participants: a systematic review and meta-analysis
Source: PubMed Central journal article supplement (PMC6595586; doi:10.1186/s13643-019-1063-z), 2019-06-27
Supplement: 13643_2019_1063_MOESM3_ESM.pdf [file 13643_2019_1063_MOESM3_ESM.pdf]

**Table 2.** Meta-analysis for the comparison between slow x comfortable speeds for the children.

| <b>Outcome Measures</b>              | <b># studies</b> | <b>ES</b> | <b>CI lower</b> | <b>CI upper</b> | <b>SE</b> | <b>Q</b> | <b>I<sup>2</sup></b> | <b>p-value</b> |
|--------------------------------------|------------------|-----------|-----------------|-----------------|-----------|----------|----------------------|----------------|
| <b><i>Gait parameters</i></b>        |                  |           |                 |                 |           |          |                      |                |
| Cadence                              | 2                | -3.61     | -4.02           | -3.20           | 0.21      | 0.03     | 0.0%                 | <0.001*        |
| Step Length                          | 2                | -3.29     | -3.68           | -2.90           | 0.20      | 0.54     | 0.0%                 | <0.001*        |
| Stride Length                        | 1                | -3.22     | -3.92           | -2.52           | 0.36      | 0.00     | 0.0%                 | <0.001*        |
| Stance Duration                      | 1                | 0.59      | 0.29            | 0.88            | 0.15      | 0.00     | 0.0%                 | <0.001*        |
| <b><i>Joint angles</i></b>           |                  |           |                 |                 |           |          |                      |                |
| Hip Flexion                          | 1                | -0.80     | -1.11           | -0.48           | 0.16      | 0.00     | 0.0%                 | <0.001*        |
| Knee Flexion                         | 1                | -1.34     | -1.68           | -1.00           | 0.17      | 0.00     | 0.0%                 | <0.001*        |
| Ankle Dorsiflexion                   | 1                | 0.34      | 0.03            | 0.64            | 0.16      | 0.00     | 0.0%                 | 0.031*         |
| Ankle Plantarflexion                 | 1                | -1.14     | -1.46           | -0.81           | 0.17      | 0.00     | 0.0%                 | <0.001*        |
| <b><i>Joint moments</i></b>          |                  |           |                 |                 |           |          |                      |                |
| Hip Flexion                          | 1                | -1.70     | -2.06           | -1.35           | 0.18      | 0.00     | 0.0%                 | <0.001*        |
| Knee Extension                       | 1                | -1.52     | -1.87           | -1.18           | 0.18      | 0.00     | 0.0%                 | <0.001*        |
| Knee Abduction                       | 1                | -0.16     | -0.47           | 0.14            | 0.16      | 0.00     | 0.0%                 | 0.289          |
| Ankle Plantarflexion                 | 1                | -0.60     | -0.91           | -0.29           | 0.16      | 0.00     | 0.0%                 | <0.001*        |
| <b><i>Ground reaction forces</i></b> |                  |           |                 |                 |           |          |                      |                |
| Vertical1 Force                      | 2                | -1.21     | -1.44           | -0.99           | 0.12      | 0.00     | 0.0%                 | <0.001*        |
| Vertical2 Force                      | 2                | -0.42     | -0.98           | 0.13            | 0.28      | 6.88     | 85.5%                | 0.137          |
| Braking Force                        | 2                | -2.00     | -2.47           | -1.52           | 0.24      | 3.37     | 70.3%                | <0.001*        |
| Propulsive Force                     | 2                | -2.98     | -4.10           | -1.86           | 0.57      | 13.08    | 92.4%                | <0.001*        |
