# Supplementary material for: Effects of walking speed on gait biomechanics in healthy participants: a systematic review and meta-analysis
Source: PubMed Central journal article supplement (PMC6595586; doi:10.1186/s13643-019-1063-z), 2019-06-27
Supplement: 13643_2019_1063_MOESM4_ESM.pdf [file 13643_2019_1063_MOESM4_ESM.pdf]

**Table 3.** Meta-analysis for the comparison between comfortable x fast speeds for the children.

| <b>Outcome Measures</b>              | <b># studies</b> | <b>ES</b> | <b>CI lower</b> | <b>CI upper</b> | <b>SE</b> | <b>Q</b> | <b>I<sup>2</sup></b> | <b>p-value</b> |
|--------------------------------------|------------------|-----------|-----------------|-----------------|-----------|----------|----------------------|----------------|
| <b><i>Gait parameters</i></b>        |                  |           |                 |                 |           |          |                      |                |
| Cadence                              | 1                | 2.97      | 2.53            | 3.41            | 0.22      | 0.00     | 0.0%                 | <0.001*        |
| Step Length                          | 2                | 2.33      | 1.97            | 2.70            | 0.19      | 1.10     | 9.0%                 | <0.001*        |
| Stance Duration                      | 1                | -1.05     | -1.36           | -0.75           | 0.16      | 0.00     | 0.0%                 | <0.001*        |
| <b><i>Joint angles</i></b>           |                  |           |                 |                 |           |          |                      |                |
| Hip Flexion                          | 2                | 0.60      | -0.07           | 1.27            | 0.34      | 2.69     | 62.9%                | 0.079          |
| Knee Flexion                         | 2                | 0.90      | -0.42           | 2.23            | 0.67      | 8.52     | 88.3%                | 0.180          |
| Ankle Dorsiflexion                   | 1                | -0.63     | -0.94           | -0.32           | 0.16      | 0.00     | 0.0%                 | <0.001*        |
| Ankle Plantarflexion                 | 1                | 0.05      | -0.26           | 0.35            | 0.16      | 0.00     | 0.0%                 | 0.764          |
| <b><i>Joint moments</i></b>          |                  |           |                 |                 |           |          |                      |                |
| Hip Flexion                          | 2                | 1.84      | 0.92            | 2.76            | 0.47      | 3.35     | 70.1%                | <0.001*        |
| Knee Extension                       | 2                | 1.17      | 0.15            | 2.19            | 0.52      | 4.91     | 79.6%                | 0.024*         |
| Knee Abduction                       | 1                | 0.59      | 0.28            | 0.90            | 0.16      | 0.00     | 0.0%                 | <0.001*        |
| Ankle Plantarflexion                 | 2                | 0.56      | -0.19           | 1.31            | 0.38      | 3.32     | 69.9%                | 0.142          |
| <b><i>Ground reaction forces</i></b> |                  |           |                 |                 |           |          |                      |                |
| Vertical1 Force                      | 2                | 1.39      | 1.15            | 1.62            | 0.12      | 0.01     | 0.0%                 | <0.001*        |
| Vertical2 Force                      | 2                | 0.36      | -0.01           | 0.72            | 0.18      | 2.95     | 66.1%                | 0.054          |
| Braking Force                        | 2                | 1.36      | 0.99            | 1.73            | 0.19      | 2.58     | 61.3%                | <0.001*        |
| Propulsive Force                     | 2                | 1.50      | 1.27            | 1.74            | 0.12      | 0.00     | 0.0%                 | <0.001*        |
