# Supplementary material for: Effects of walking speed on gait biomechanics in healthy participants: a systematic review and meta-analysis
Source: PubMed Central journal article supplement (PMC6595586; doi:10.1186/s13643-019-1063-z), 2019-06-27
Supplement: 13643_2019_1063_MOESM5_ESM.pdf [file 13643_2019_1063_MOESM5_ESM.pdf]

**Table 4.** Meta-analysis for the comparison between slow x comfortable speeds for the older adults.

| <b>Outcome Measures</b>       | <b># studies</b> | <b>ES</b> | <b>CI lower</b> | <b>CI upper</b> | <b>SE</b> | <b>Q</b> | <b>I<sup>2</sup></b> | <b>p-value</b> |
|-------------------------------|------------------|-----------|-----------------|-----------------|-----------|----------|----------------------|----------------|
| <b><i>Gait parameters</i></b> |                  |           |                 |                 |           |          |                      |                |
| Cadence                       | 2                | -1.76     | -2.84           | -0.69           | 0.55      | 2.66     | 62.4%                | 0.001*         |
| Step Length                   | 1                | -1.14     | -1.81           | -0.47           | 0.34      | 0.00     | 0.0%                 | 0.001*         |
| Stride Length                 | 1                | -1.06     | -2.10           | -0.01           | 0.53      | 0.00     | 0.0%                 | 0.048*         |
| Stance Duration               | 1                | 0.52      | -0.48           | 1.52            | 0.51      | 0.00     | 0.0%                 | 0.307          |
| <b><i>Joint angles</i></b>    |                  |           |                 |                 |           |          |                      |                |
| Hip Flexion                   | 2                | -0.26     | -0.79           | 0.26            | 0.27      | 0.16     | 0.0%                 | 0.327          |
| Hip Extension                 | 2                | -0.33     | -0.86           | 0.20            | 0.27      | 0.14     | 0.0%                 | 0.224          |
| Knee Flexion                  | 1                | -0.66     | -1.67           | 0.35            | 0.51      | 0.00     | 0.0%                 | 0.198          |
| Ankle Dorsiflexion            | 2                | 0.12      | -0.41           | 0.64            | 0.27      | 0.21     | 0.0%                 | 0.659          |
| Ankle Plantarflexion          | 2                | -0.10     | -0.63           | 0.42            | 0.27      | 0.02     | 0.0%                 | 0.704          |
| <b><i>Joint moments</i></b>   |                  |           |                 |                 |           |          |                      |                |
| Hip Flexion                   | 1                | -0.52     | -1.51           | 0.48            | 0.51      | 0.00     | 0.0%                 | 0.310          |
| Knee Extension                | 1                | 0.13      | -0.85           | 1.11            | 0.50      | 0.00     | 0.0%                 | 0.789          |
| Ankle Plantarflexion          | 1                | -0.86     | -1.88           | 0.17            | 0.52      | 0.00     | 0.0%                 | 0.100          |
