# Supplementary material for: Effects of walking speed on gait biomechanics in healthy participants: a systematic review and meta-analysis
Source: PubMed Central journal article supplement (PMC6595586; doi:10.1186/s13643-019-1063-z), 2019-06-27
Supplement: 13643_2019_1063_MOESM6_ESM.pdf [file 13643_2019_1063_MOESM6_ESM.pdf]

**Table 5.** Meta-analysis for the comparison between comfortable x fast speeds for the older adults.

| <b>Outcome Measures</b>       | <b># studies</b> | <b>ES</b> | <b>CI lower</b> | <b>CI upper</b> | <b>SE</b> | <b>Q</b> | <b>I<sup>2</sup></b> | <b>p-value</b> |
|-------------------------------|------------------|-----------|-----------------|-----------------|-----------|----------|----------------------|----------------|
| <i><b>Gait parameters</b></i> |                  |           |                 |                 |           |          |                      |                |
| Cadence                       | 2                | 1.43      | 1.00            | 1.87            | 0.22      | 0.24     | 0.0%                 | <0.001*        |
| Step Length                   | 1                | 1.11      | 0.44            | 1.77            | 0.34      | 0.00     | 0.0%                 | 0.001*         |
| Stride Length                 | 1                | 0.98      | 0.46            | 1.51            | 0.27      | 0.00     | 0.0%                 | <0.001*        |
| <i><b>Joint angles</b></i>    |                  |           |                 |                 |           |          |                      |                |
| Hip Flexion                   | 2                | 0.57      | 0.17            | 0.96            | 0.20      | 0.75     | 0.0%                 | 0.005*         |
| Hip Extension                 | 2                | 0.11      | -0.28           | 0.49            | 0.20      | 0.13     | 0.0%                 | 0.594          |
| Knee Flexion                  | 1                | 0.47      | -0.04           | 0.97            | 0.26      | 0.00     | 0.0%                 | 0.070          |
| Ankle Dorsiflexion            | 2                | -0.29     | -0.68           | 0.10            | 0.20      | 1.39     | 27.9%                | 0.148          |
| Ankle Plantarflexion          | 2                | 0.12      | -0.27           | 0.51            | 0.20      | 0.00     | 0.0%                 | 0.548          |
| <i><b>Joint moments</b></i>   |                  |           |                 |                 |           |          |                      |                |
| Hip Flexion                   | 1                | 1.01      | 0.48            | 1.54            | 0.27      | 0.00     | 0.0%                 | <0.001*        |
| Knee Extension                | 1                | 1.26      | 0.71            | 1.80            | 0.28      | 0.00     | 0.0%                 | <0.001*        |
| Ankle Plantarflexion          | 1                | -0.13     | -0.63           | 0.37            | 0.25      | 0.00     | 0.0%                 | 0.612          |
